# Supplementary material for: A 500-year tale of co-evolution, adaptation, and virulence: Helicobacter pylori in the Americas
Source: PubMed Central journal article supplement (PMC7853065; doi:10.1038/s41396-020-00758-0), 2020-09-02
Supplement: 41396_2020_758_MOESM3_ESM.pdf [file 41396_2020_758_MOESM3_ESM.pdf]

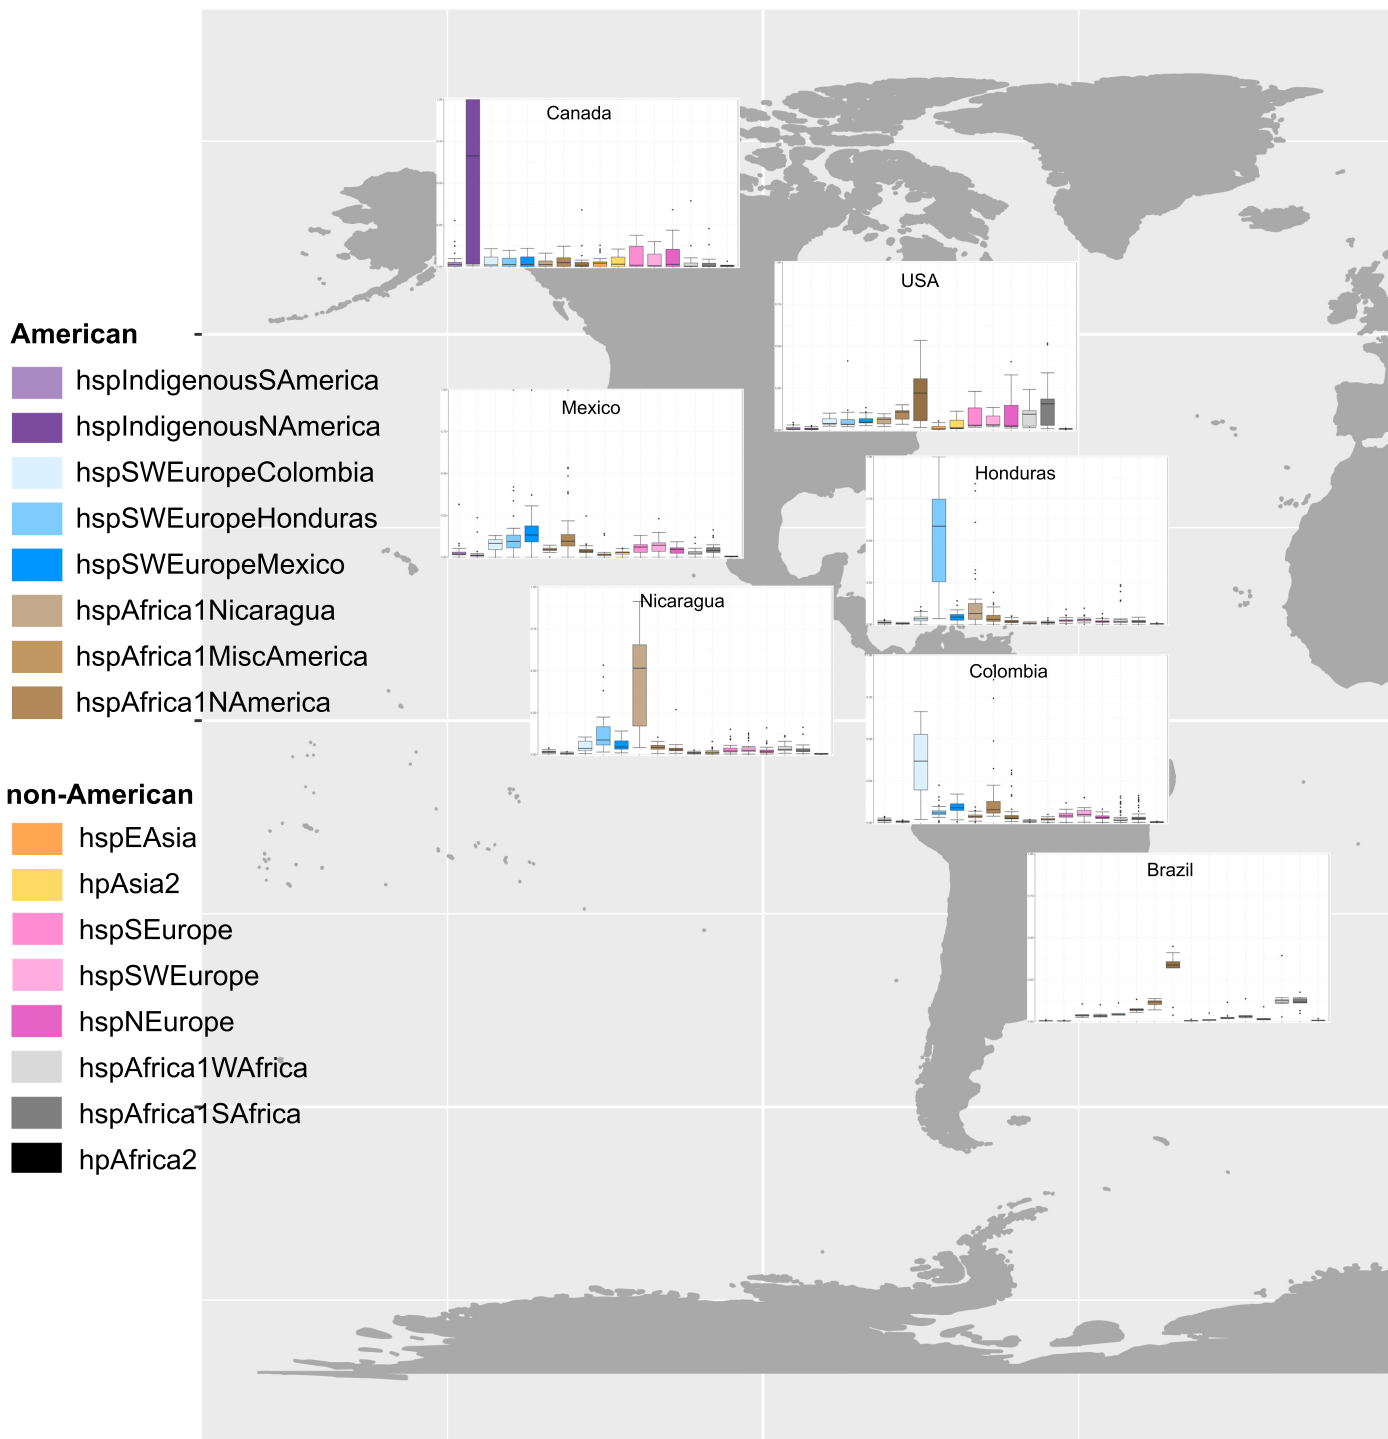

**Suppl. Fig 3. Comparative admixture analyses of *H. pylori* strains in the Americas by country.**

The proportion of ancestry of each subpopulation present by country was estimated and the mean plus deviation standard is represented in Box plots.
