# Supplementary material for: A 500-year tale of co-evolution, adaptation, and virulence: Helicobacter pylori in the Americas
Source: PubMed Central journal article supplement (PMC7853065; doi:10.1038/s41396-020-00758-0), 2020-09-02
Supplement: 41396_2020_758_MOESM4_ESM.pdf [file 41396_2020_758_MOESM4_ESM.pdf]

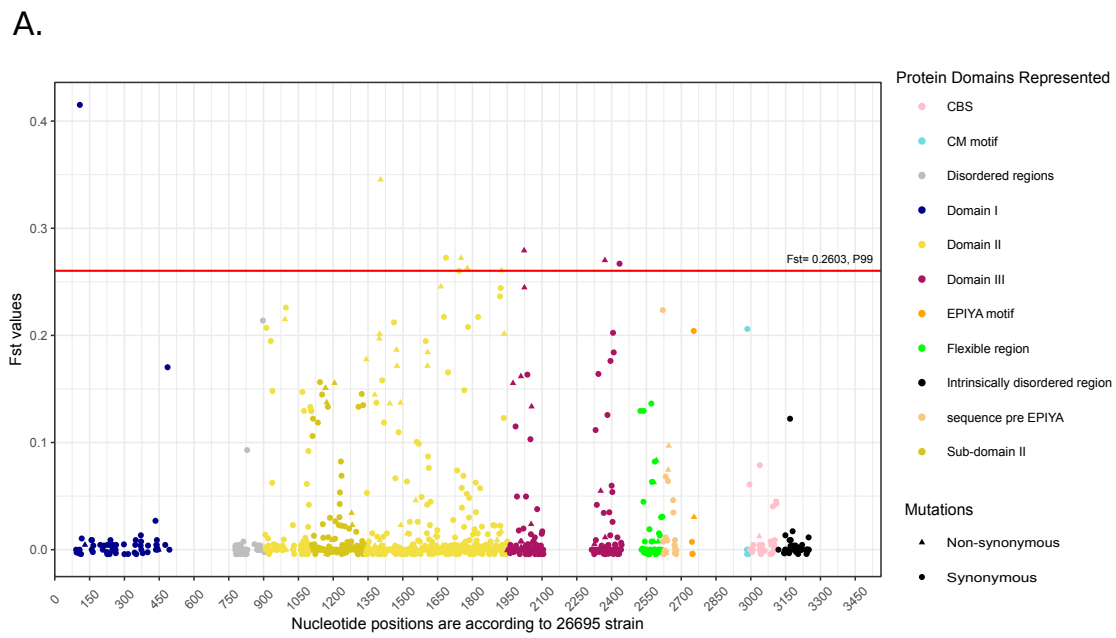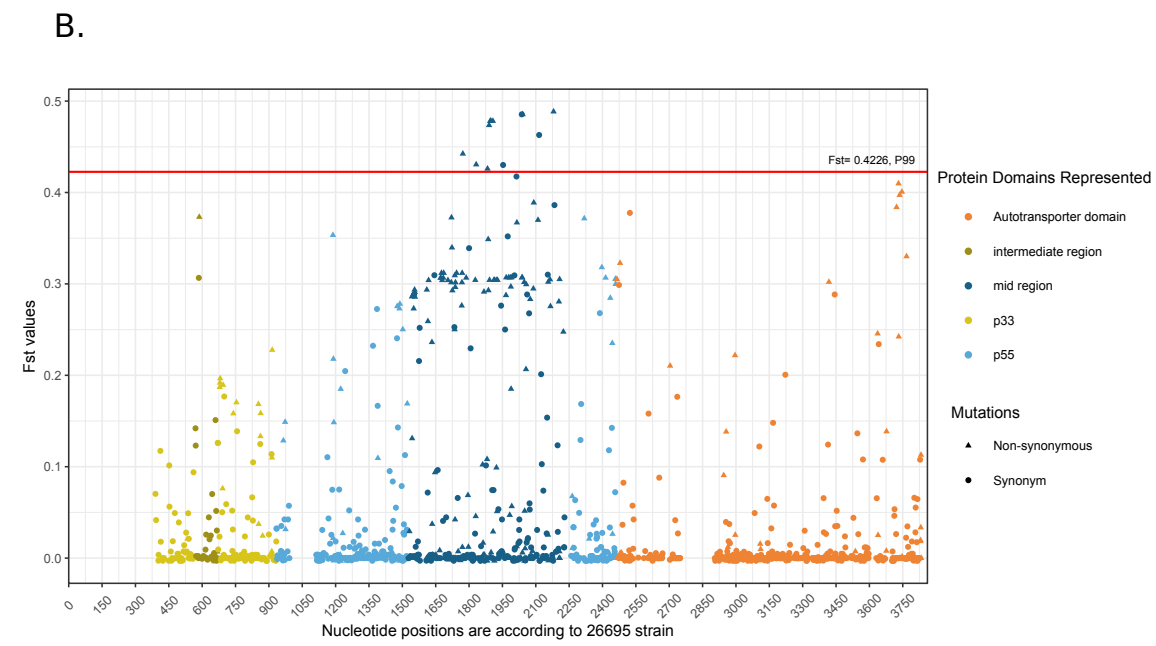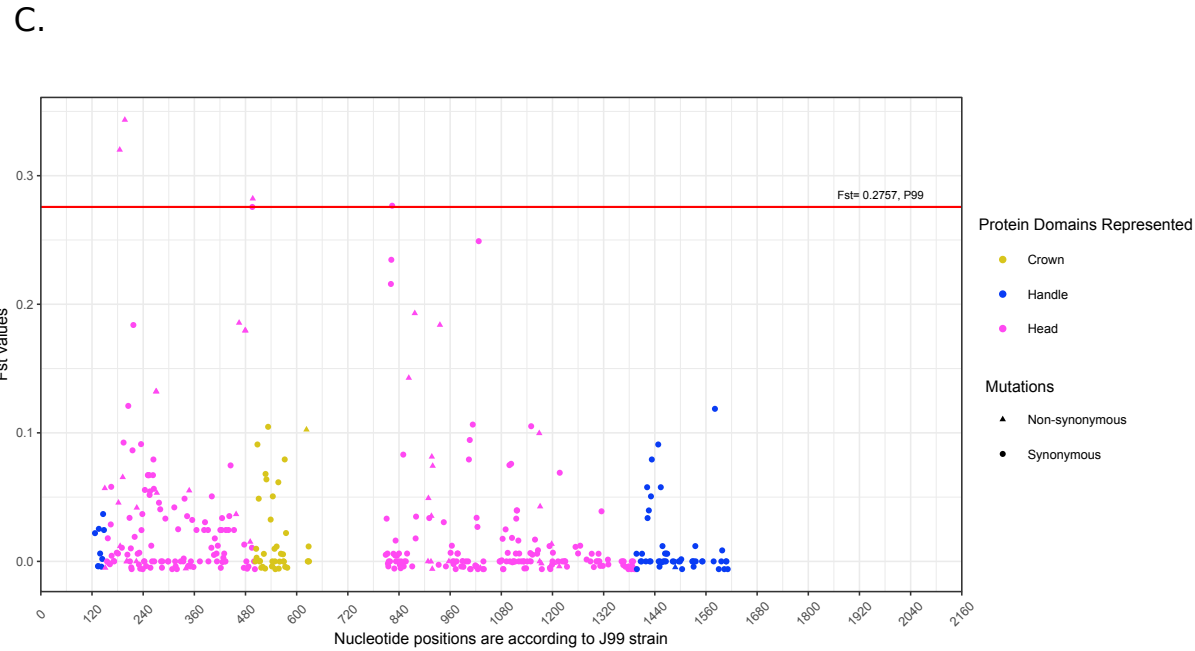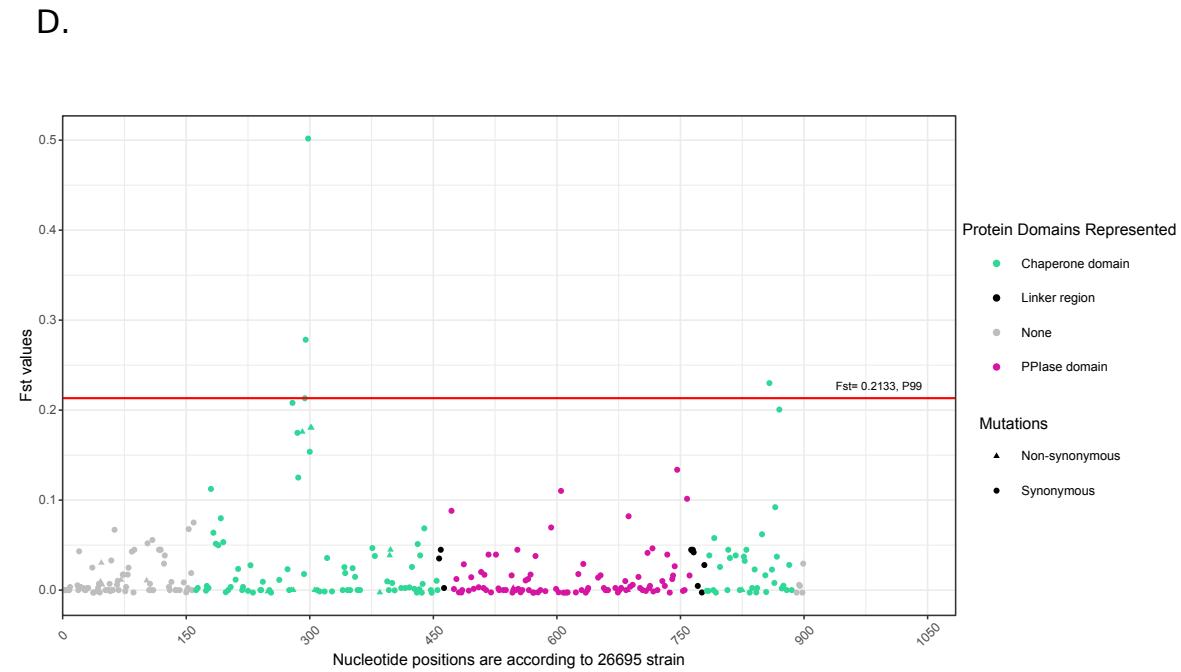

**Suppl. Fig. 4. Fst analysis of individual virulence genes to identify genetic variants that are significantly more commonly in the Americas than in the rest of the world.**

The X axis indicates the nucleotide position in the gene, whereas the Y axis shows the Fst value for each position. a) *cagA*, b) *vacA*, c) *babA*, and d) *ppiC*. Known domains for each protein were taken from: for *CagA*, [41]; for *VacA*, [62]; for *BabA*, [63]; and for *PpiC*, [64].
