# Supplementary material for: A 500-year tale of co-evolution, adaptation, and virulence: Helicobacter pylori in the Americas
Source: PubMed Central journal article supplement (PMC7853065; doi:10.1038/s41396-020-00758-0), 2020-09-02
Supplement: 41396_2020_758_MOESM5_ESM.pdf [file 41396_2020_758_MOESM5_ESM.pdf]

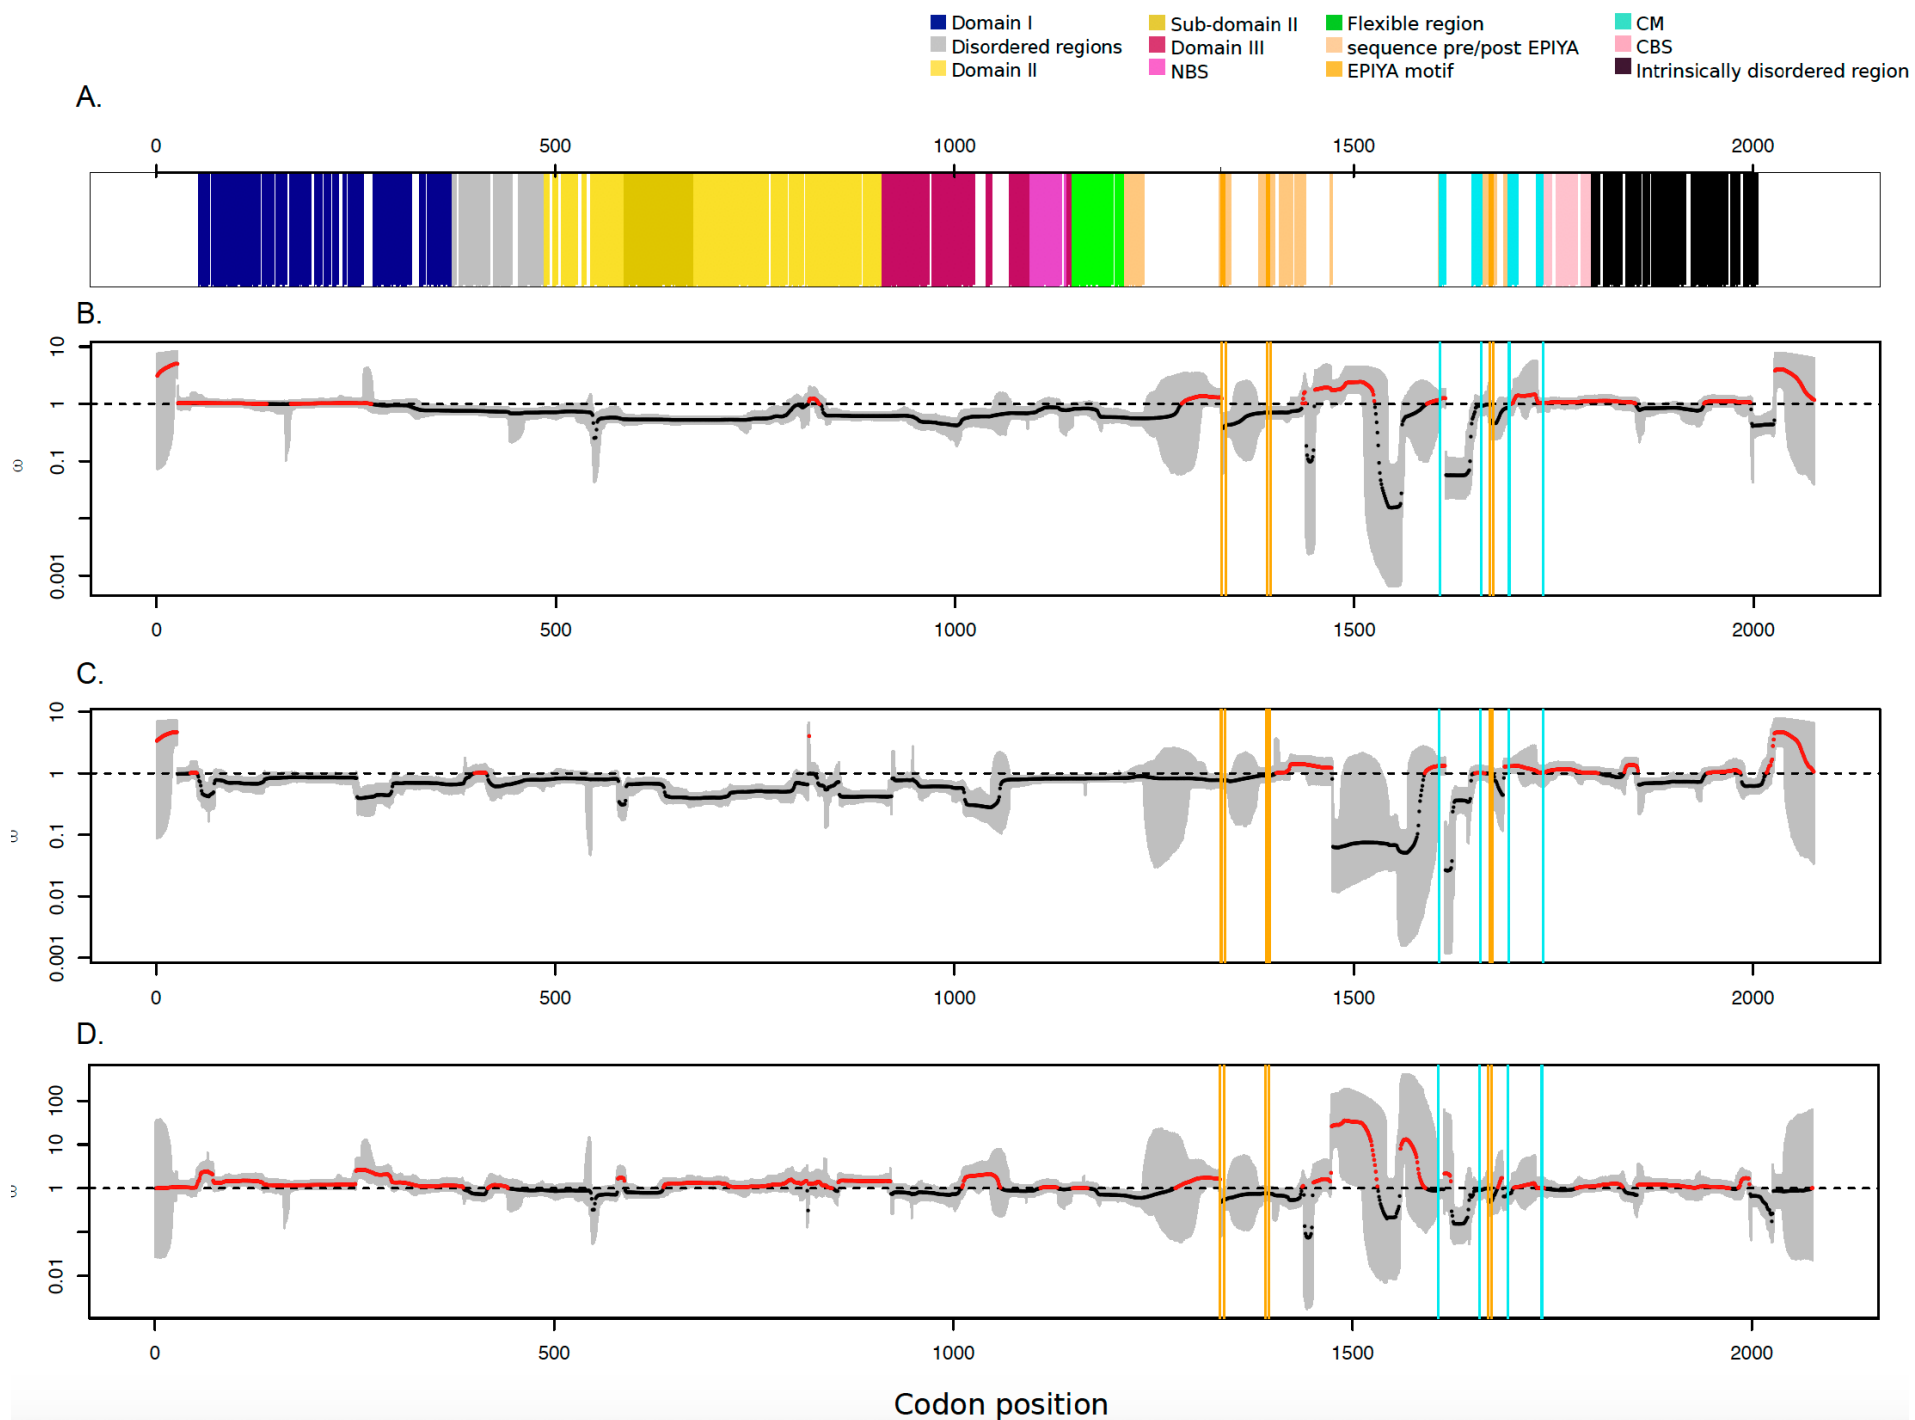

**Suppl. Fig. 5. Analyses of positions under selective pressure in the *cagA* gene of strains from the Americas and other continents using GenomegaMap.** a) Known domains of CagA [42]; b) omega values for each position of *cagA* in strains from the Americas; c) omega values for each position of *cagA* in non-American strains; d) America/non-America ratio of omega values showing positive pressure is higher in most regions of the gene in American strains relative to non-American strains. In b, c and d the orange horizontal lines show the 3 EPIYA motifs and the blue lines the CM motifs, according to the 26695 strain.
